# Supplementary material
Source: Royal Society of Chemistry journal article supplement (doi:10.1039/d6ta02071b)
Supplement: d6ta02071b1.pdf [file d6ta02071b1.pdf]

## Supporting Information

# Single-Atom Bi Embedded in the Surface Lattice of Pd Nanoparticles: Enhancing Catalytic Activity and Stability for Formic Acid Dehydrogenation

**Jianfei Jin,<sup>a</sup> Dongqin Guo,<sup>a</sup> Zhichao Liu,<sup>ab</sup> Hui Yin,<sup>ab</sup> Niangxiu Li,<sup>ab</sup> Aiming  
Zhang,<sup>ab</sup> Feng Liu,<sup>ab</sup> Yunbo Jiang,<sup>\*ab</sup>**

<sup>a</sup>State Key Laboratory of Precious Metal Functional Materials, Kunming Institute of  
Precious Metals, Kunming, China

<sup>b</sup>Yunnan Precious Metals Laboratory Co., Ltd., Kunming, China

**Correspondence:** Yunbo Jiang (E-mail: [jyb@ipm.com.cn](mailto:jyb@ipm.com.cn))

## Supplementary Note

According to the previous studies, the hydrogen production rate  $r$  for the aqueous formic acid formate solution can be expressed as follows at the steady state [1]:

$$r = \frac{kb_{f,M}c_f}{[1 + b_{f,M}c_f + (b_{f,B}c_f)^{0.5} + (b_Hc_H)^{0.5}]^2} \quad (S1)$$

where  $k$  denotes the kinetic rate constant,  $c_f$  and  $c_H$  denote the concentrations of formate ion and dihydrogen in the solution.  $b_{f,M}$ ,  $b_{f,B}$  and  $b_H$  are the adsorption constants of  $\text{HCOO}^* \text{M}$ ,  $\text{HCOO}^* \text{B}$  and  $\text{H}^*$  respectively. Where  $*$  denotes an active site,  $\text{HCOO}^* \text{M}$  and  $\text{HCOO}^* \text{B}$  denotes the formate species occupying one and two active sites, respectively. Notably, the cleavage of the C–H in  $\text{HCOO}^* \text{M}$  bond is a kinetically essential step of FAD, whereas  $\text{HCOO}^* \text{B}$  serves as a spectator species due to a very high energy barrier for the cleavage of its H–C bond. Equation S1 suggests that a maximum  $r$  can be obtained by varying  $c_f$ , which is consistent with previous reports [1,2].

Based on DFT, the effect of Bi atom doping on the catalytic decomposition of formic acid on the Pd(111) surface was systematically investigated. By calculating the adsorption energies of reactants, reaction intermediates, and products, as well as the activation barriers of transition states, the regulatory mechanism of Bi doping on the reactivity of the Pd(111) surface was elucidated. First, the adsorption behaviors of key species such as  $\text{HCOOH}$ ,  $\text{COOH}$ ,  $\text{HCOO}$ , and  $\text{CO}_2$  were examined. As shown in Figure S6, these species all exhibit a bidentate coordination mode, interacting with surface Pd atoms through C–Pd, O–Pd, or H–Pd bonds. Specifically,  $\text{HCOOH}$  coordinates via its O and H atoms,  $\text{HCOO}$  forms covalent bonds with surface Pd through its two O atoms, while  $\text{COOH}$  and  $\text{CO}_2$  bond with Pd atoms via one C atom and one O atom.

In this work, Bi<sub>1</sub>@Pd/CMK-3 refers to 0.08Bi@Pd/CMK-3; FA refers to formic acid and SF refers to sodium formate.

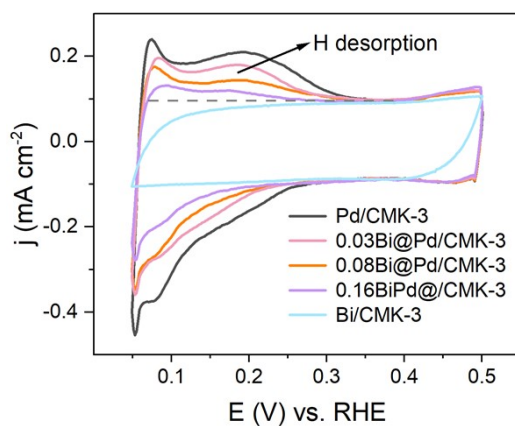

**Figure S1.** Cyclic voltammograms displaying hydrogen adsorption-desorption for Pd/CMK, 0.03Bi@Pd/CMK, 0.08Bi@Pd/CMK-3, 0.16Bi@Pd/CMK, and Bi/CMK-3 in 0.1 M HClO<sub>4</sub> at 10 mV s<sup>-1</sup>

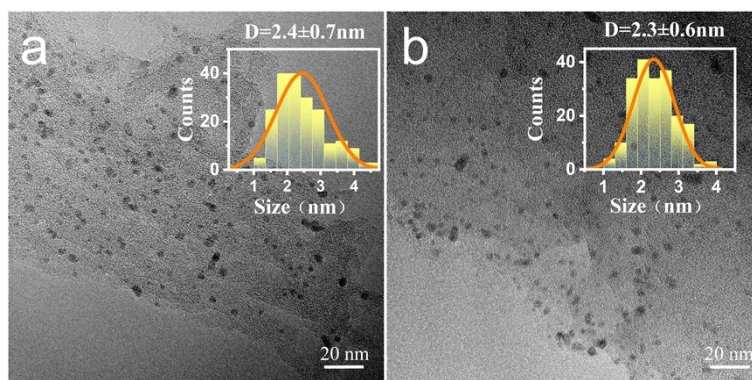

**Figure S2.** TEM images and corresponding statistical distribution of the particle sizes of (A) Pd/CMK and (B) Bi<sub>1</sub>@Pd/CMK-3 after 3 cycles of catalytic FAD in 1.1 M FA + 2.4 M SF solution at 323 K

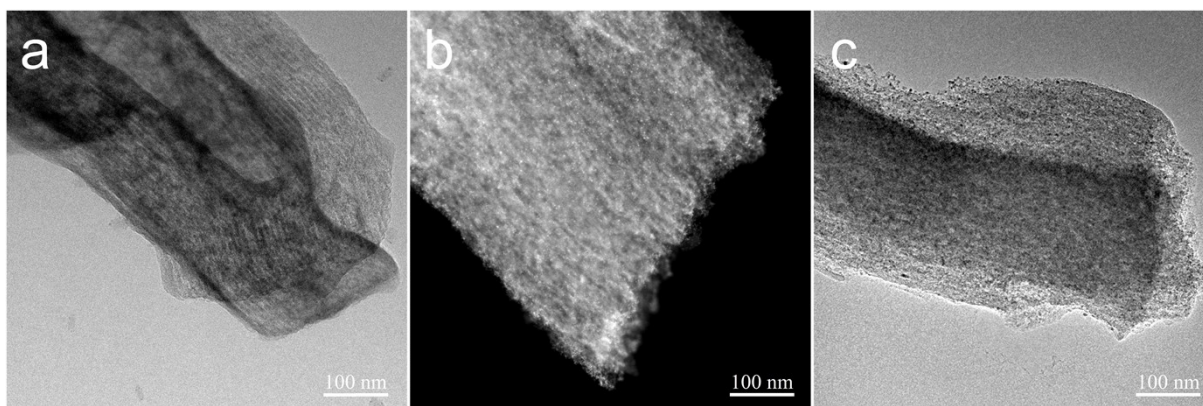

**Figure S3.** TEM image of (A) CMK-3, (B) HAADF-STEM image of Bi<sub>1</sub>@Pd/CMK-3, (C) TEM image of Bi<sub>1</sub>@Pd/CMK-3 after 300h FAD

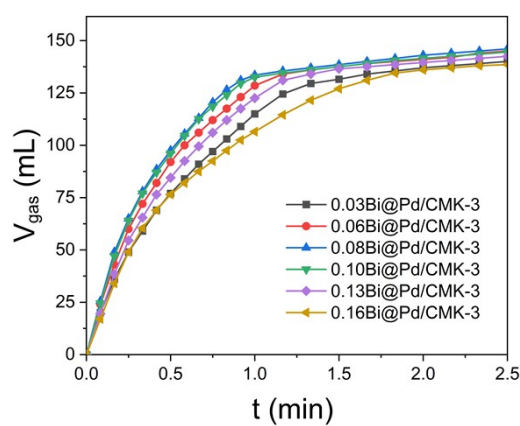

**Figure S4.** Time course of gas evolution from 2 mL of 1.1 M FA + 2.4 M SF solution in the presence of 32 mg of  $x$ Bi@Pd/C at 323 K with different Bi/Pd molar ratio  $x$

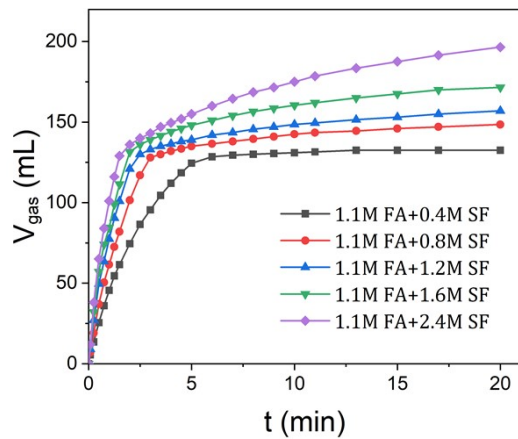

**Figure S5.** Time course of gas evolution from 2 mL of 1.1 M FA + n M SF solution with 32 mg of Pd/CMK-3 at 323 K

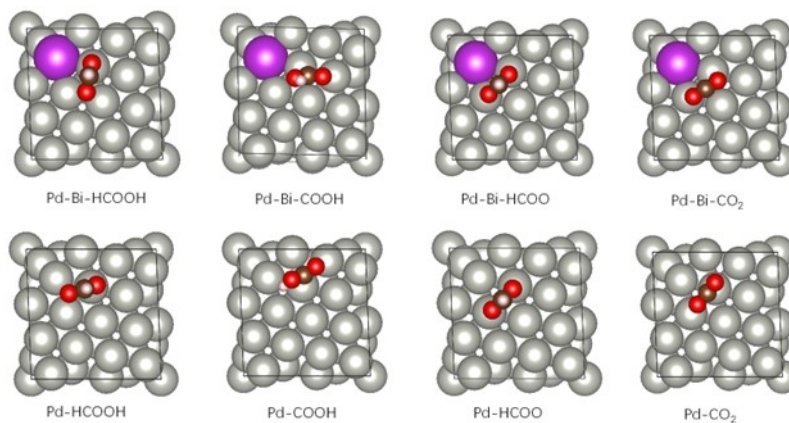

**Figure S6.** Adsorption configurations of HCOOH, COOH, HCOO, and CO<sub>2</sub> on Bi<sub>1</sub>@Pd-(111) and Pd(111) surfaces.

| Precursor Pd<br>wt% | Measured Pd<br>wt% | Measured $n_{\text{Bi}}/n_{\text{Pd}}$ ,<br>$x$ |
|---------------------|--------------------|-------------------------------------------------|
| 5.00                | 4.97               | 0.00                                            |
| 4.96                | 4.83               | 0.08                                            |
| 4.93                | 4.93               | 0.16                                            |
| 5.00                | 4.47               | 0.00(300h-FAD)                                  |
| 4.96                | 4.68               | 0.08(300h-FAD)                                  |

**Table S1.** Pd deposition on Pd/C and  $x\text{Bi}@Pd/\text{CMK-3}$  measured by ICP-AES.

| Precursor Bi<br>wt% | Measured Bi<br>wt% | Precursor $n_{\text{Bi}}/n_{\text{Pd}}$ ,<br>$x$ |
|---------------------|--------------------|--------------------------------------------------|
| 0.294               | 0.294              | 0.03                                             |
| 0.586               | 0.587              | 0.06                                             |
| 0.779               | 0.775              | 0.08                                             |
| 0.972               | 0.977              | 0.10                                             |
| 1.069               | 1.085              | 0.11                                             |
| 1.260               | 1.257              | 0.13                                             |
| 1.547               | 1.503              | 0.16                                             |
| 0.584               | 0.775              | 0.08(without Pd)                                 |
| 0.779               | 0.734              | 0.08(300h-FAD)                                   |

**Table S2.** Bi deposition on Pd/CMK-3 and  $x\text{Bi}@Pd/\text{CMK-3}$  measured by ICP-AES.

**Table S3.** TOF of Catalytic formic acid dehydrogenation at 323 K with different concentration of sodium formate in 2 mL aqueous solution.

| Catalyst                  | $c_{FA}$ (mol L <sup>-1</sup> ) | $c_{SF}$ (mol L <sup>-1</sup> ) | TOF (h <sup>-1</sup> ) |
|---------------------------|---------------------------------|---------------------------------|------------------------|
| Pd/CMK-3                  | 1.1                             | 0.4                             | 3226                   |
|                           | 1.1                             | 0.8                             | 4857                   |
|                           | 1.1                             | 1.2                             | 6555                   |
|                           | 1.1                             | 1.6                             | 8334                   |
|                           | 1.1                             | 2.4                             | 9919                   |
|                           | 1.1                             | 3.2                             | 11447                  |
|                           | 1.1                             | 4.0                             | 12355                  |
|                           | 1.1                             | 4.8                             | 11662                  |
| Bi <sub>1</sub> @Pd/CMK-3 | 1.1                             | 0.4                             | 6498                   |
|                           | 1.1                             | 0.8                             | 10319                  |
|                           | 1.1                             | 1.2                             | 13425                  |
|                           | 1.1                             | 1.6                             | 15799                  |
|                           | 1.1                             | 2.4                             | 19762                  |
|                           | 1.1                             | 3.2                             | 22620                  |
|                           | 1.1                             | 4.0                             | 24012                  |
|                           | 1.1                             | 4.8                             | 21028                  |

**Table S4.** TOF values of catalytic formic acid dehydrogenation performed over different catalysts in different conditions - a comparison with literature reports.

| Catalyst                                               | Temperature (°C) | $c_{FA}$ (mol L <sup>-1</sup> ) | $c_{SF}$ (mol L <sup>-1</sup> ) | TOF(h <sup>-1</sup> ) | Reference |
|--------------------------------------------------------|------------------|---------------------------------|---------------------------------|-----------------------|-----------|
| Bi <sub>1</sub> @Pd/CMK-3                              | 30               | 1.1                             | 2.4                             | 7275                  | This work |
|                                                        | 40               |                                 |                                 | 12827                 |           |
|                                                        | 50               |                                 |                                 | 19762                 |           |
|                                                        | 60               |                                 |                                 | 28902                 |           |
| Pd/CMK-3                                               | 30               | 1.1                             | 0.8                             | 3556                  | This work |
|                                                        | 50               |                                 |                                 | 10320                 |           |
| PdBi <sub>0.11</sub> /C                                | 30               | 1.1                             | 2.4                             | 4350                  | [1]       |
| Pd-N30 /C                                              | 30               | 1.1                             | 0.8                             | 3481                  | [3]       |
| Pd/CN <sub>ZM</sub>                                    | 50               | 1.0                             | 1.0                             | 4157                  | [4]       |
| Pd/NH <sub>2</sub> -CNT                                | 30               | 0.5                             | 2.0                             | 2560                  | [5]       |
|                                                        | 50               |                                 |                                 | 8137                  |           |
| Pd/FeNC                                                | 50               | 1.5                             | 3.75                            | 7361                  | [6]       |
| Pd <sub>60</sub> Au <sub>40</sub> /HPC-NH <sub>2</sub> | 25               | 2.5                             | 0                               | 3763                  | [7]       |
| Pd/YSMSNs-NH <sub>2</sub> (10-3)                       | 50               | 0.5                             | 1                               | 2783                  | [8]       |
| In situ-Pd@MSC                                         | 30               | 3.6                             | 3.6                             | 2569                  | [9]       |
|                                                        | 50               |                                 |                                 | 6700                  |           |
| Pd-WO <sub>x</sub> /(P)NPCC                            | 30               | 0.5                             | 1.5                             | 2877                  | [10]      |
|                                                        | 50               |                                 |                                 | 6135                  |           |
| Pd-B/C                                                 | 30               | 1.1                             | 0.8                             | 1184                  | [11]      |
| Au <sub>0.4</sub> Pd <sub>0.6</sub> /PEI-PDA@CNCs      | 50               | 0.5                             | 2                               | 4258                  | [12]      |
|                                                        | 60               |                                 |                                 | 7159                  |           |

|                                                             |          |      |     |               |      |
|-------------------------------------------------------------|----------|------|-----|---------------|------|
| Pd <sub>0.6</sub> Co <sub>0.2</sub> Ni <sub>0.2</sub> /N-CN | 25       | 0.5  | 0.5 | 1249          | [13] |
| Pd/NHPC-AC                                                  | 60       | 1.5  | 1.5 | 4115          | [14] |
| Ag <sub>2</sub> Pd <sub>8</sub> /TiO <sub>2</sub> -M-450    | 60       | 1.5  | 4.5 | 4789          | [15] |
| AP-SiO <sub>2</sub> @PDA-<br>NGO@Pd                         | 50<br>65 | 1.06 | 0   | 8274<br>18625 | [16] |

## References

- [1] X. Qin, H. Li, S. Xie, K. Li, T. Jiang, X.-Y. Ma, K. Jiang, Q. Zhang, O. Terasaki, Z. Wu and W.-B. Cai, *ACS Catalysis*, 2020, 10, 3921-3932.
- [2] Q. Wang, N. Tsumori, M. Kitta and Q. Xu, *ACS Catalysis*, 2018, 8, 12041-12045.
- [3] Y. Yu, X. Wang, C. Liu, F. Vladimir, J. Ge and W. Xing, *Journal of Energy Chemistry*, 2020, 40, 212-216.
- [4] M. Deng, A. Yang, J. Ma, C. Yang, T. Cao, S. Yang, M. Yao, F. Liu, X. Wang and J. Cao, *ACS Applied Materials & Interfaces*, 2022, 14, 18550-18560.
- [5] Y. Kim, H. Lee, S. Yang, J. Lee, H. Kim, S. Hwang, S. W. Jeon and D. H. Kim, *Journal of Catalysis*, 2021, 404, 324-333.
- [6] S. Zhong, X. Yang, L. Chen, N. Tsumori, N. Taguchi and Q. Xu, *ACS Applied Materials & Interfaces*, 2021, 13, 46749-46755.
- [7] Z. Wang, S. Liang, X. Meng, S. Mao, X. Lian and Y. Wang, *Applied Catalysis B: Environmental*, 2021, 291, 120140.
- [8] C. Zhou, S. Li, H. Chai, Q. Liu, J. Hu, Z. Liu, K. Yu, F. Fan, W. Zhou, A. Duan, C. Xu and X. Wang, *Applied Catalysis B: Environment and Energy*, 2024, 346, 123750.
- [9] Q.-L. Zhu, F.-Z. Song, Q.-J. Wang, N. Tsumori, Y. Himeda, T. Autrey and Q. Xu, *Journal of Materials Chemistry A*, 2018, 6, 5544-5549.
- [10] A. Zhang, J. Xia, Q. Yao and Z.-H. Lu, *Applied Catalysis B: Environmental*, 2022, 309, 121278.
- [11] K. Jiang, K. Xu, S. Zou and W.-B. Cai, *Journal of the American Chemical Society*, 2014, 136, 4861-4864.
- [12] J. Shen, Y. Liang, C. Wang and Y. Zhu, *Chemical Engineering Journal*, 2023, 473, 144640.
- [13] Z. Dong, F. Li, Q. He, X. Xiao, M. Chen, C. Wang, X. Fan and L. Chen, *International Journal of Hydrogen Energy*, 2019, 44, 11675-11683.
- [14] Y. Chen, X. Li, Z. Wei, S. Mao, J. Deng, Y. Cao and Y. Wang, *Catalysis Communications*, 2018, 108, 55-58.
- [15] X. Sun, F. Li, Z. Wang, H. An, W. Xue and Y. Wang, *ChemCatChem*, 2021, 14, e202101528.
- [16] W. Ye, W. Pei, S. Zhou, H. Huang, Q. Li, J. Zhao, R. Lu, Y. Ge and S. Zhang, *Journal of Materials Chemistry A*, 2019, 7, 10363-10371.
